# Supplementary material for: Synthesis of a comprehensive population code for contextual features in the awake sensory cortex
Source: eLife journal article supplement (doi:10.7554/elife.62687), 2021-10-28

## A Driven C1 column neurons

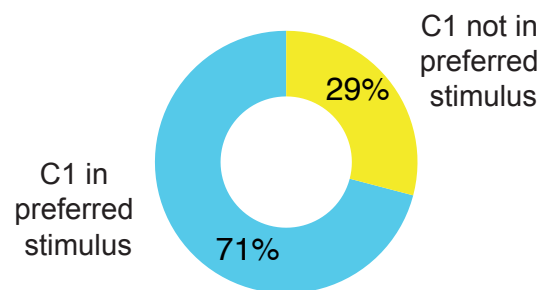

## B Driven C1 column neurons

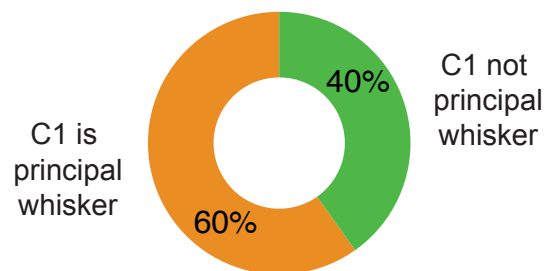

## C Driven Neurons: Normalized Tuning Curves

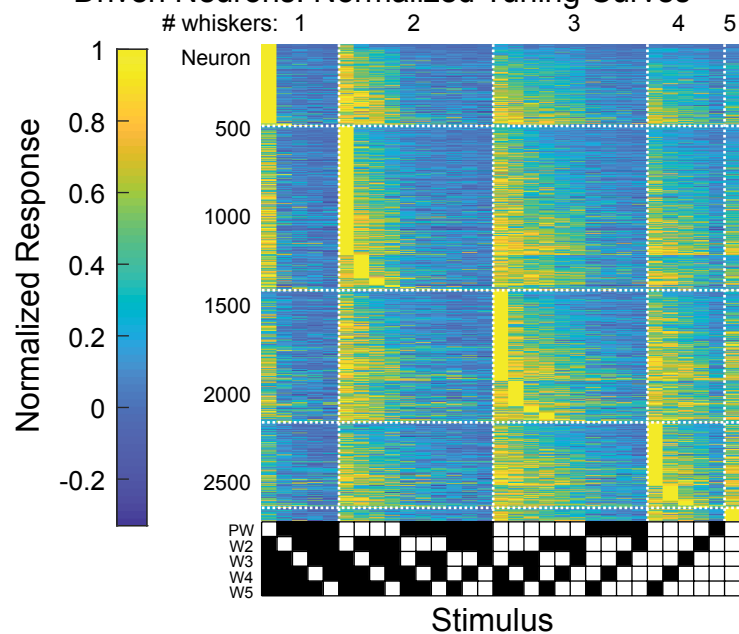

## D Normalized Linear Difference

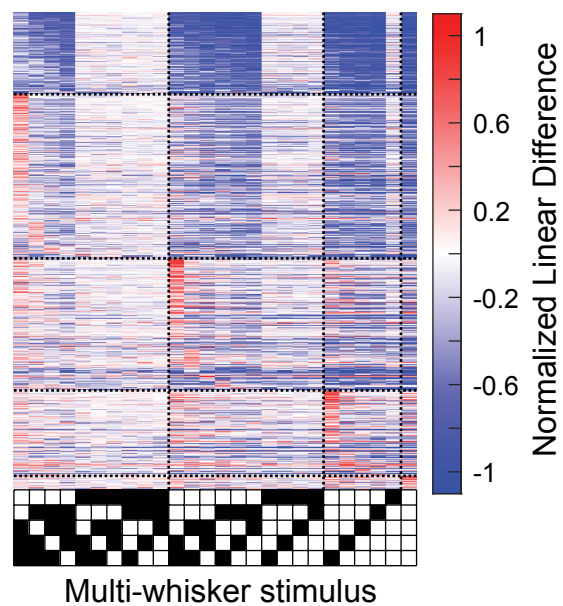

Supplement: supp [file elife_poa_e62687_Figure_3_figure_supplement_1.pdf › elife_poa_e62687_Figure_3_figure_supplement_1.pdf]
