# Supplementary figures and images for: Synthesis of a comprehensive population code for contextual features in the awake sensory cortex
Source: eLife journal article supplement (doi:10.7554/elife.62687), 2021-10-28

**A**

0.610s

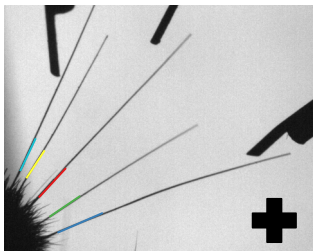

0.613s

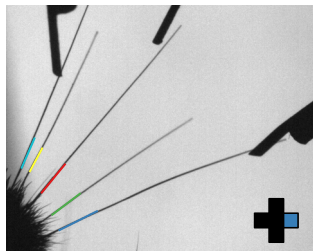

0.617s

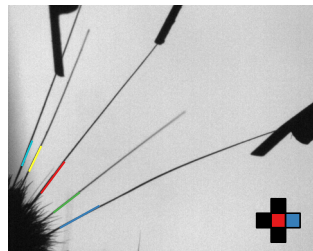

0.620s

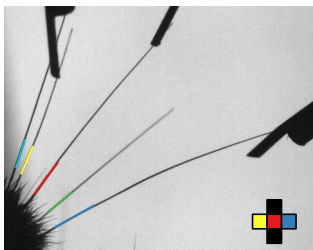

0.623s

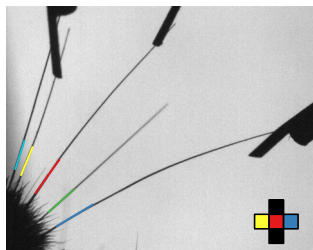

0.627s

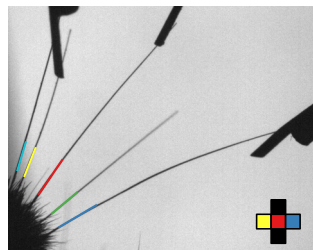

0.630s

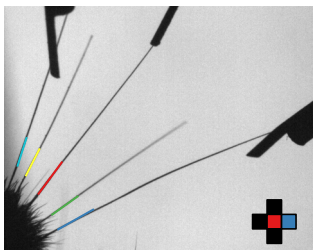

0.633s

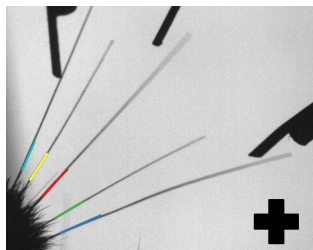**B**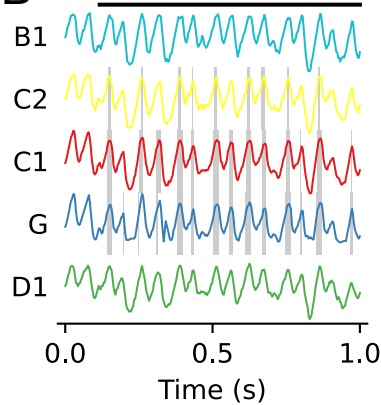

Supplement: supp [file elife_poa_e62687_Figure_1_figure_supplement_1.pdf › elife_poa_e62687_Figure_1_figure_supplement_1.pdf]

A

L4

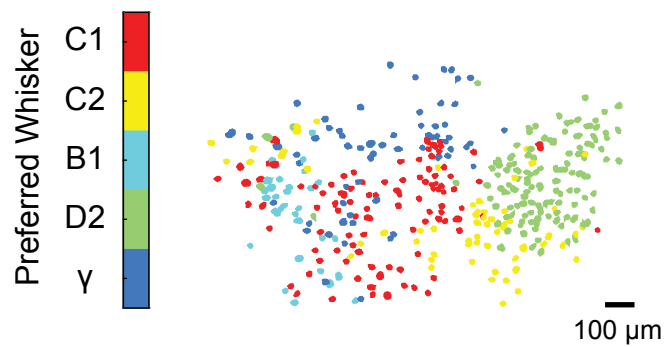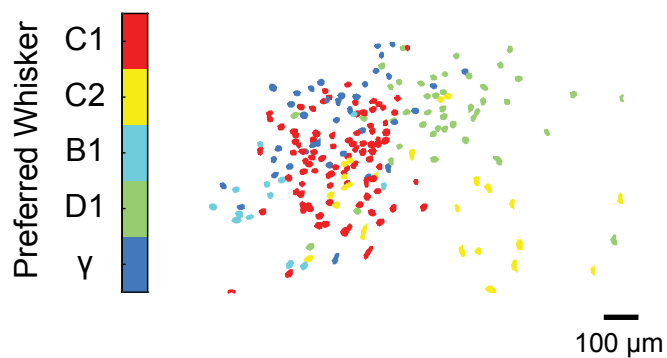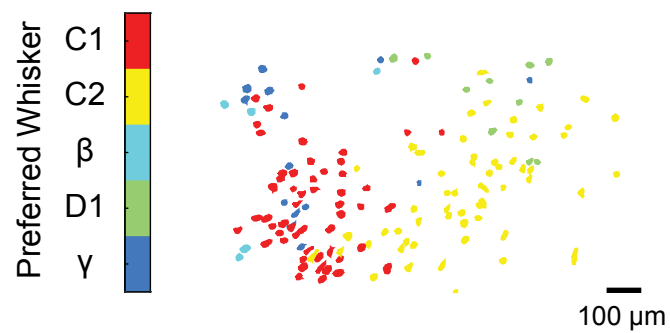

B

L2/3

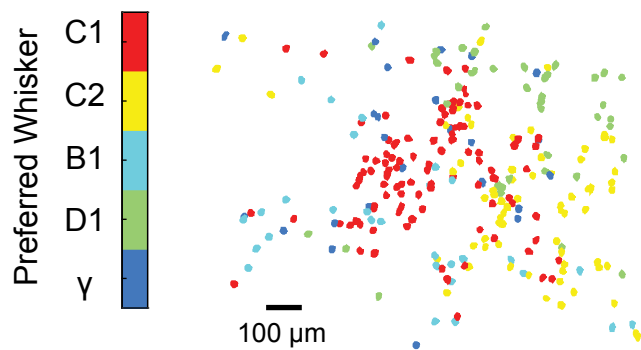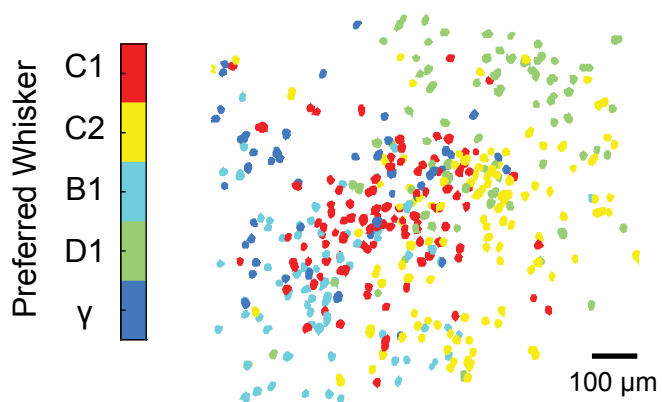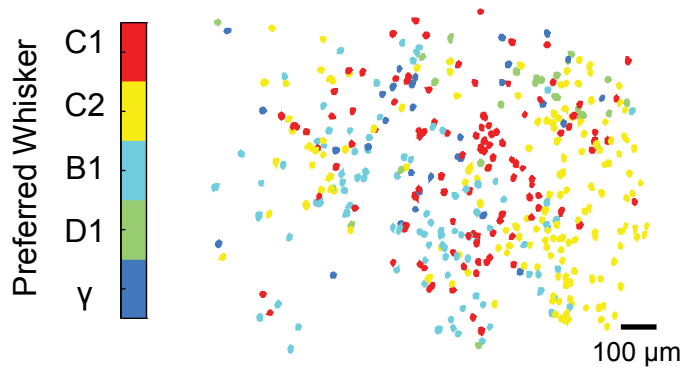

Supplement: supp [file elife_poa_e62687_Figure_2_figure_supplement_1.pdf › elife_poa_e62687_Figure_2_figure_supplement_1.pdf]

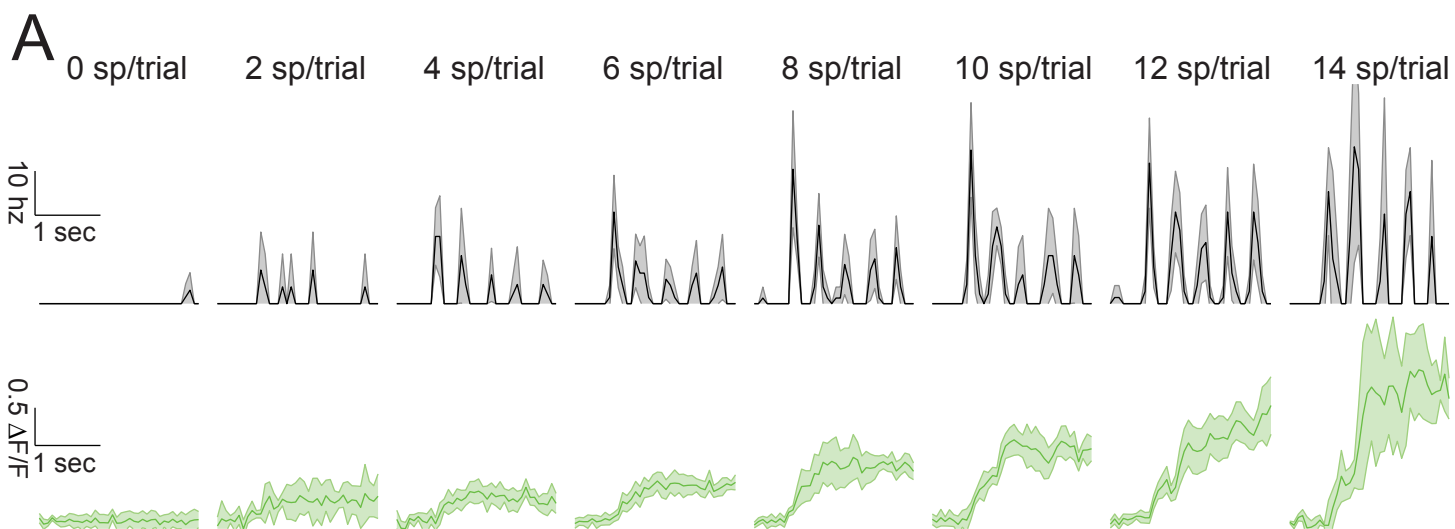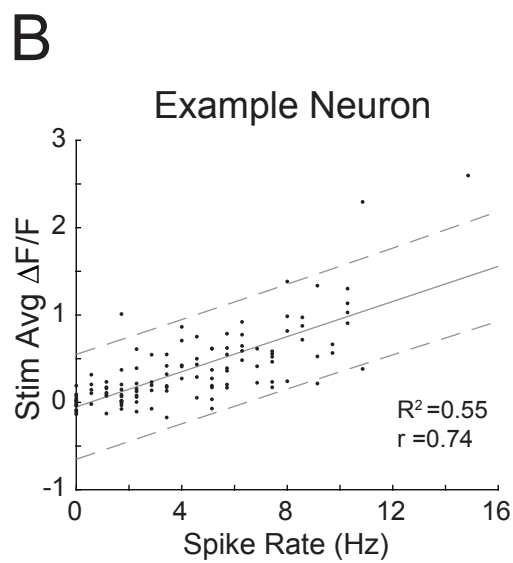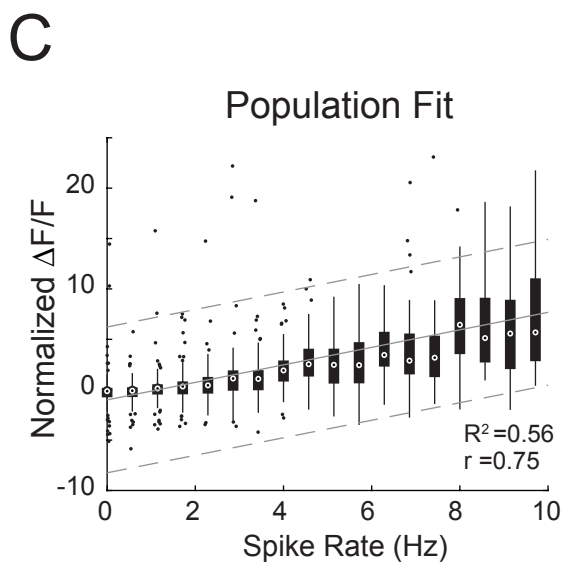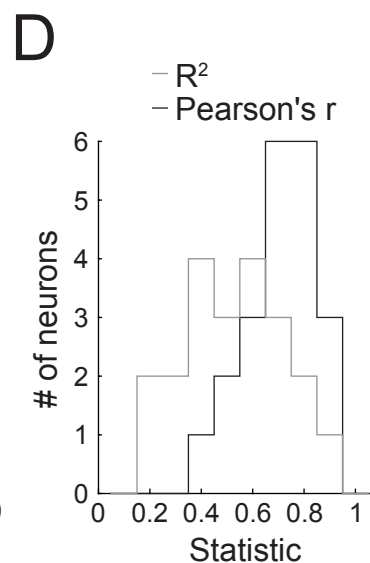

Supplement: supp [file elife_poa_e62687_Figure_2_figure_supplement_2.pdf › elife_poa_e62687_Figure_2_figure_supplement_2.pdf]

**A**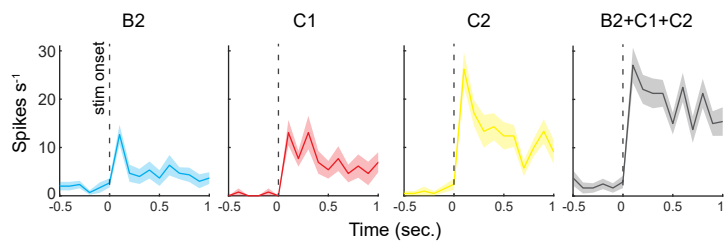**B**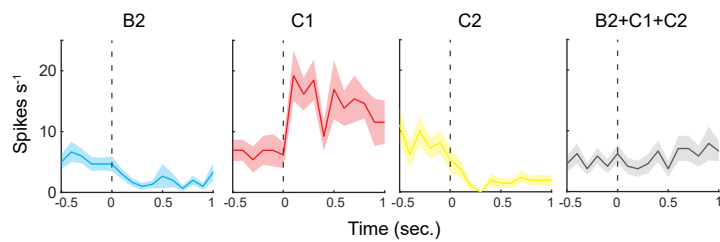**C**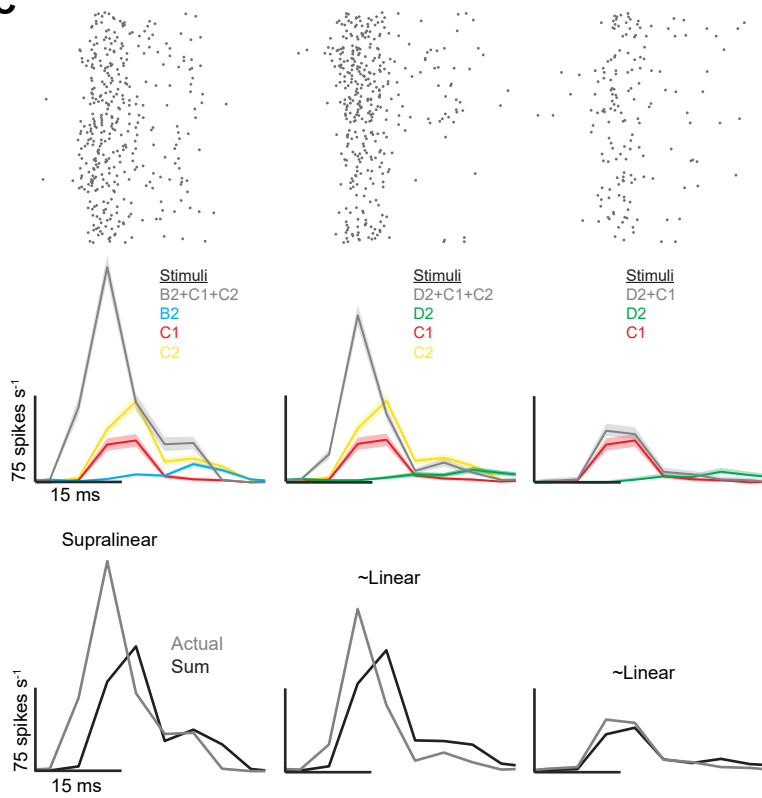**D**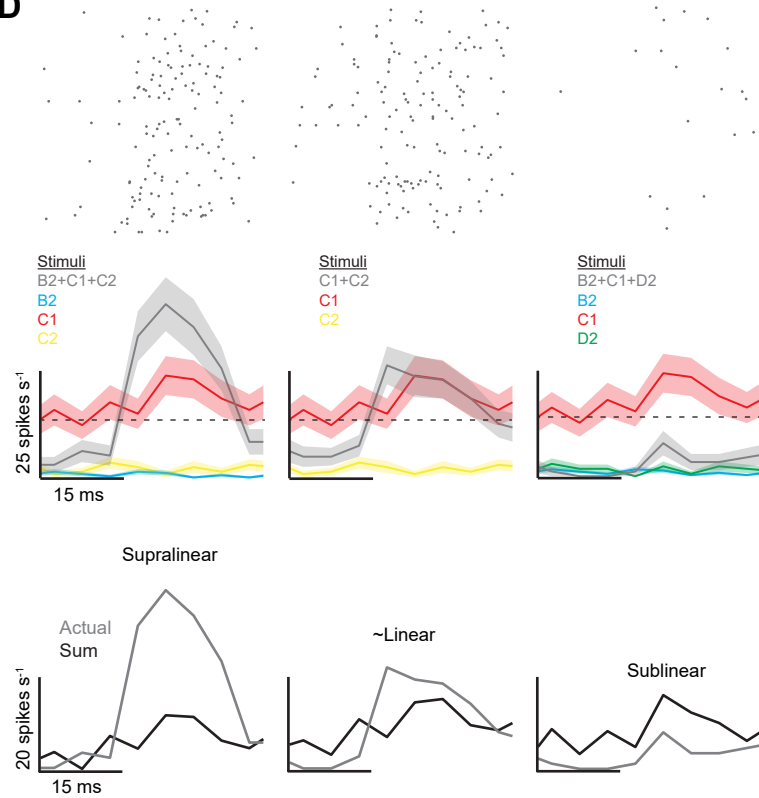**E**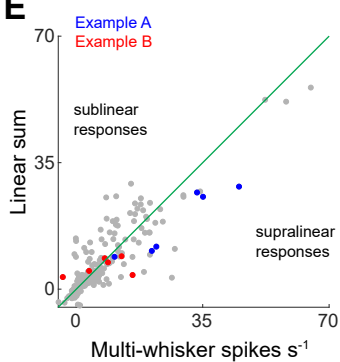**F**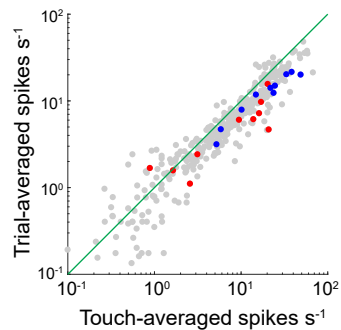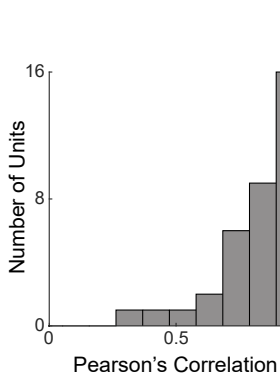**G**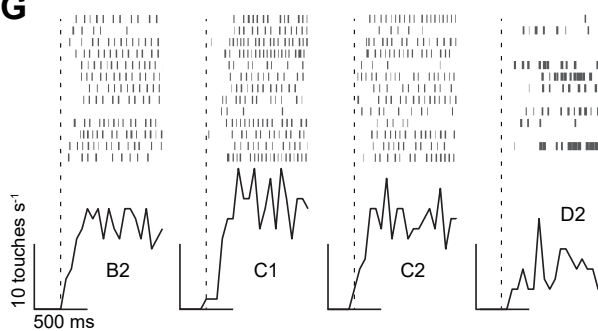

Supplement: supp [file elife_poa_e62687_Figure_2_figure_supplement_4.pdf › elife_poa_e62687_Figure_2_figure_supplement_4.pdf]

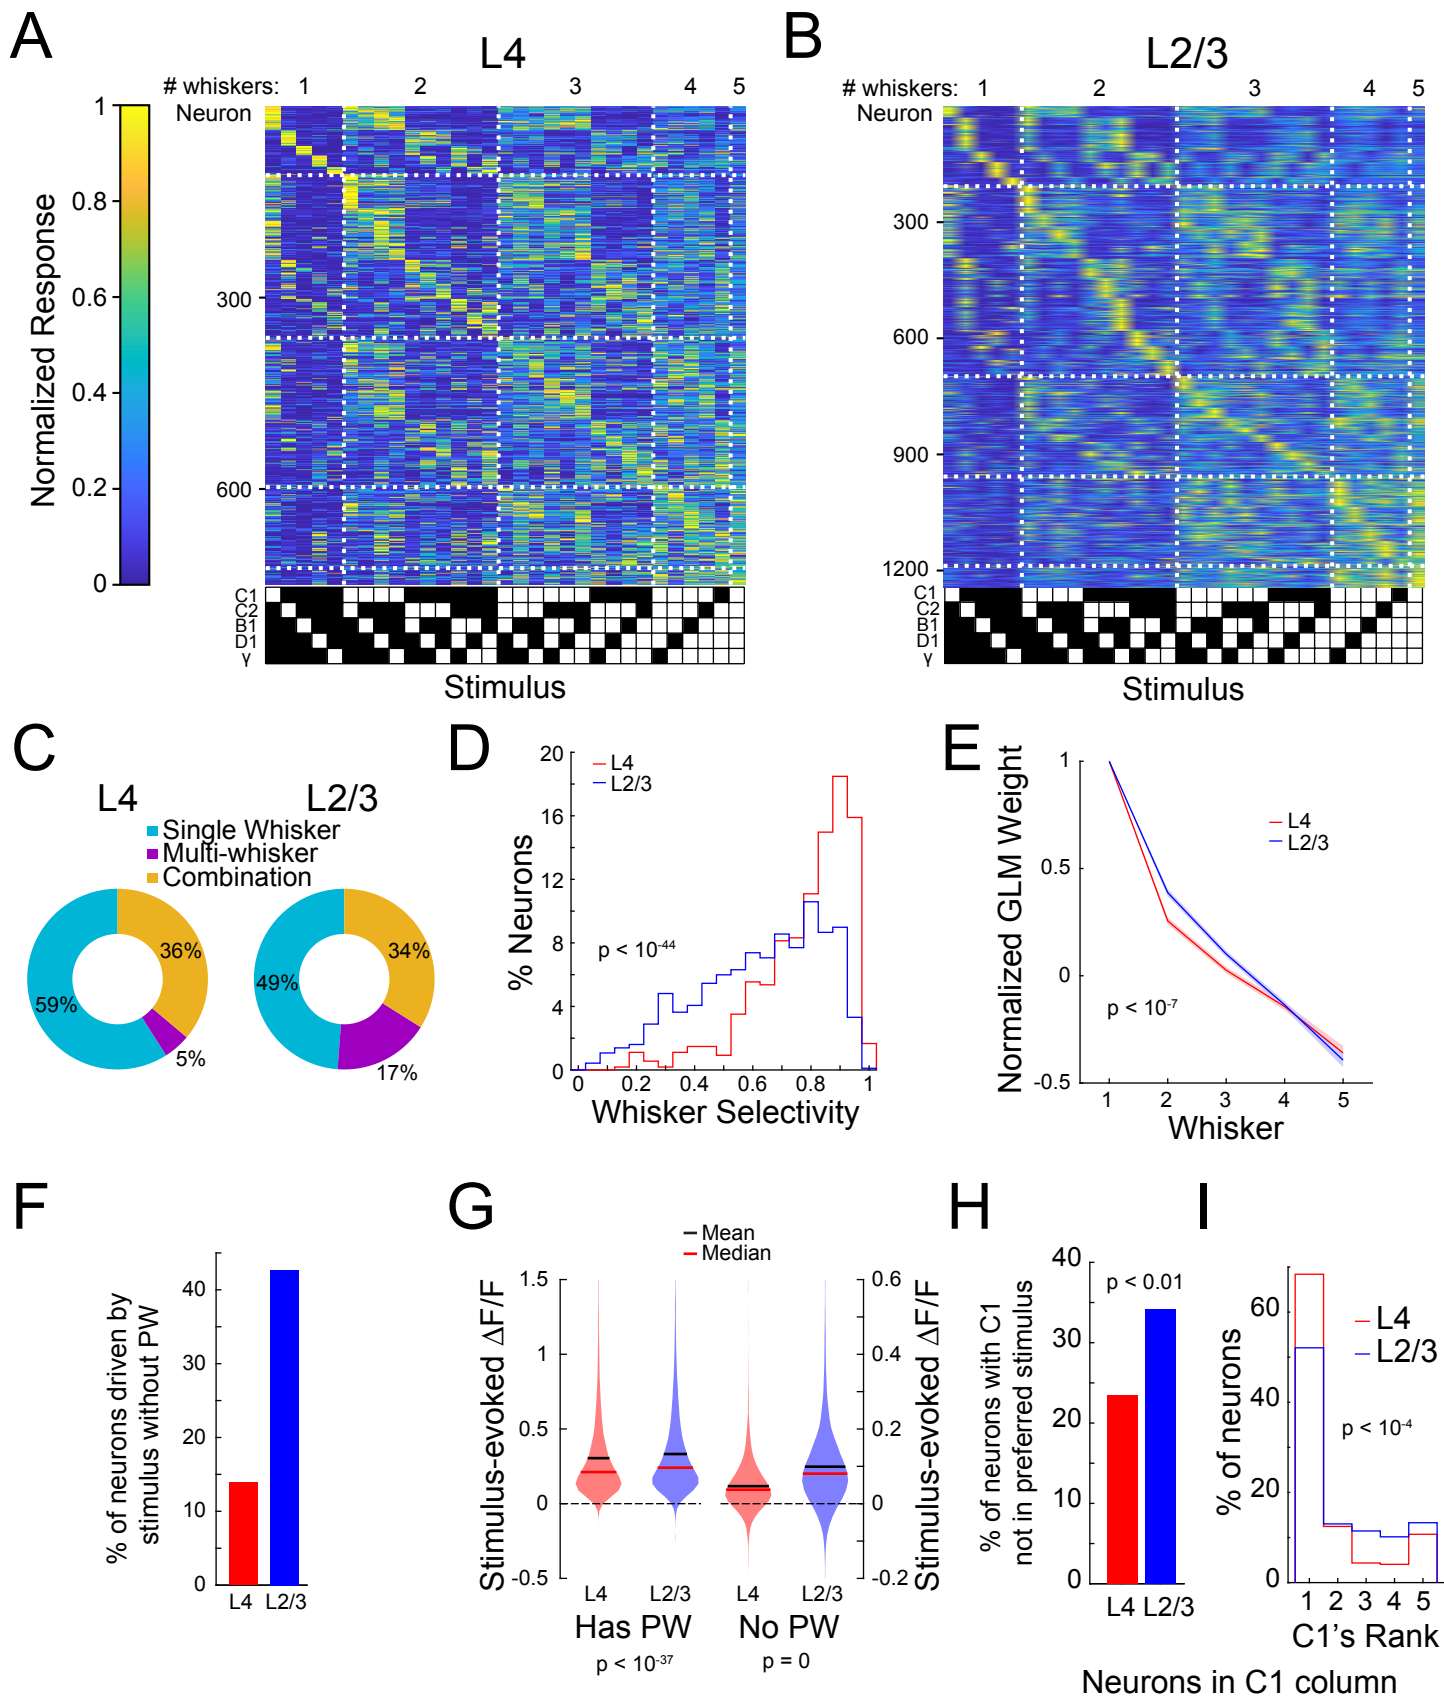

Supplement: supp [file elife_poa_e62687_Figure_3_figure_supplement_2.pdf › elife_poa_e62687_Figure_3_figure_supplement_2.pdf]

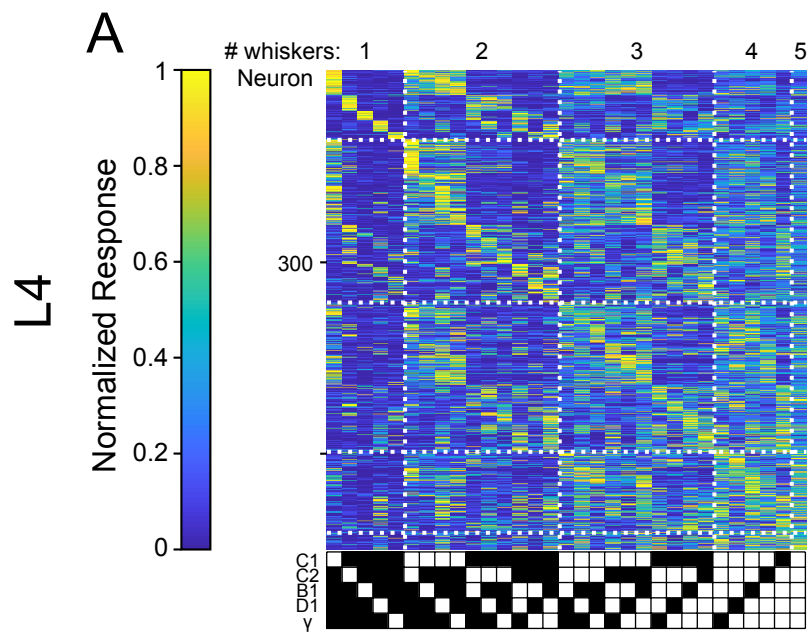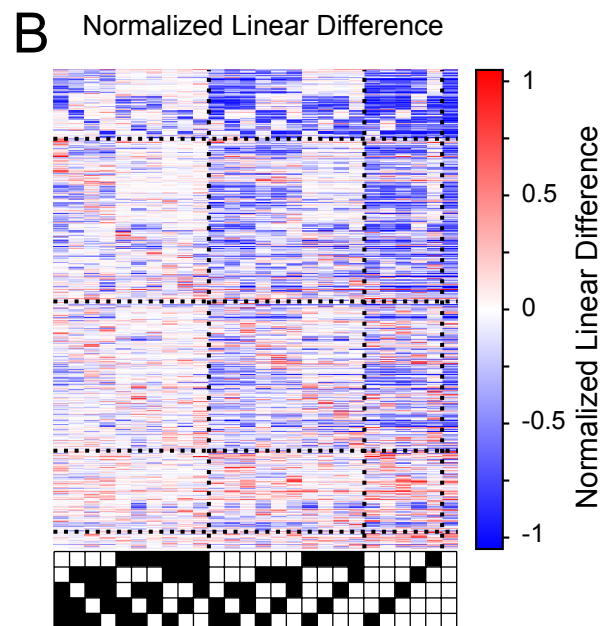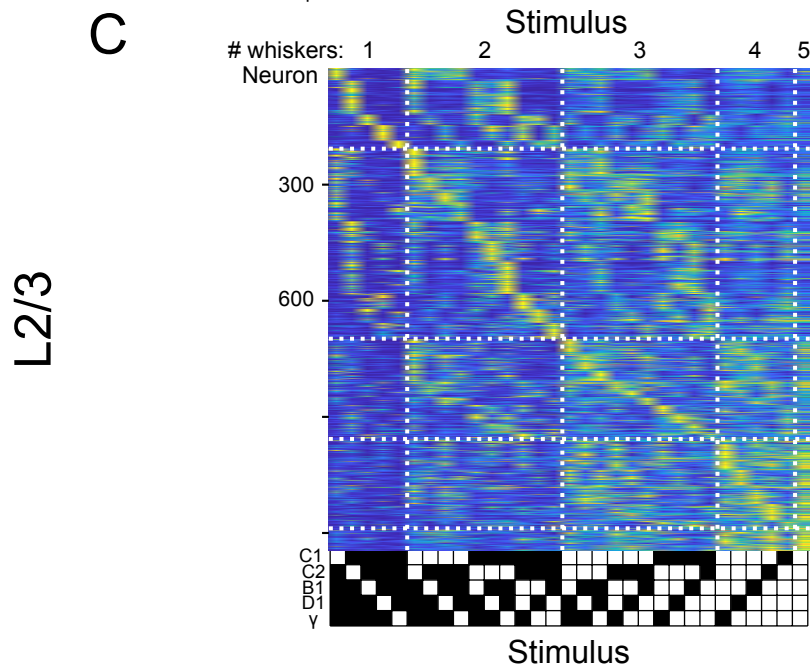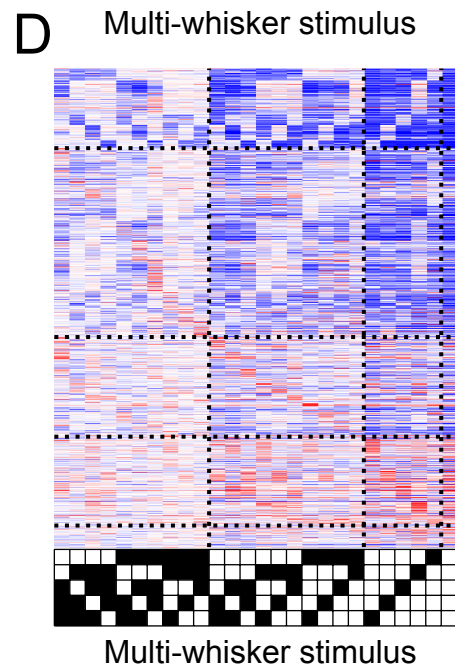

Supplement: supp [file elife_poa_e62687_Figure_3_figure_supplement_3.pdf › elife_poa_e62687_Figure_3_figure_supplement_3.pdf]

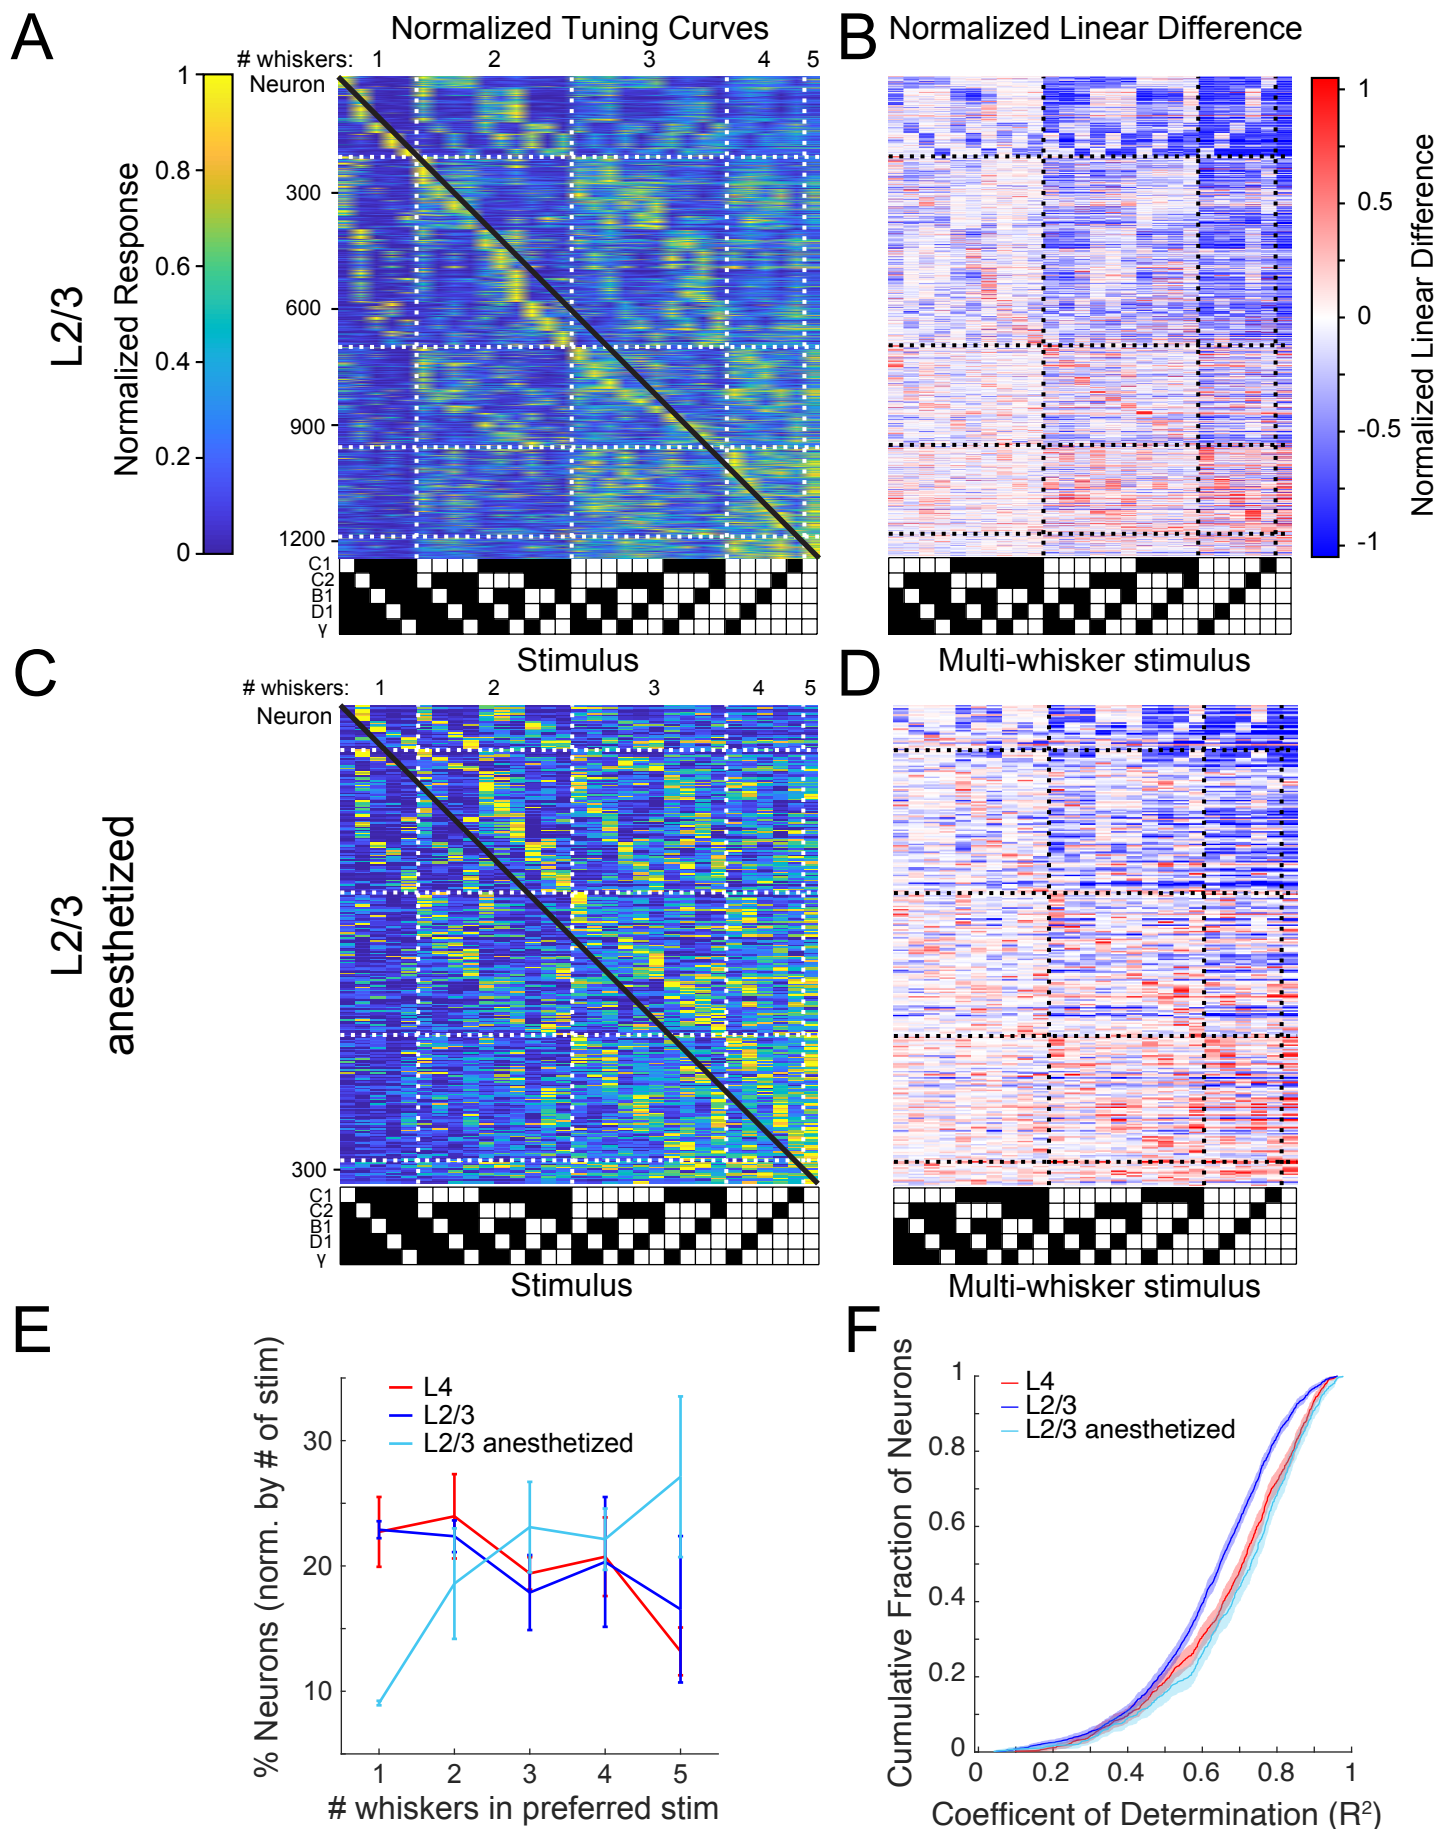

Supplement: supp [file elife_poa_e62687_Figure_3_figure_supplement_4.pdf › elife_poa_e62687_Figure_3_figure_supplement_4.pdf]
